# Supplementary material for: Early abolition of cough reflex predicts mortality in deeply sedated brain-injured patients
Source: PeerJ. 2020 Nov 26;8:e10326. doi: 10.7717/peerj.10326 (PMC7700733; doi:10.7717/peerj.10326)
Supplement: Supplemental Information 1 [file peerj-08-10326-s001.xls]

## Sheet: data-export
uid	sex	age	motifadm2	motifintub	IGS2	maccabe	poids	GCSadm	SOFAadm	FOUR	FOUR.E	FOUR.M	FOUR.B	FOUR.R	RASSinc	corneal	plr	gtp	cough	myosis	midazolam	dose_midazolam	propofol	dose_propofol	thiopental	morphinique	dose_sufenta	dose_fenta	durvent	dursedat	htic	PAVM	delawake	delayed	delirium	ICUstay	dcrea
1	Male	45-49	Traumatic brain injury	Coma	41	2	89	5	13	6	0	0	4	2	-5	Present	Present	Absent	Present	Absent	1	0.674157303	0	NA	0	Sufentanyl	3.370786517	NA	6	2	0	1	Inf	1	NA	5	1
2	Male	85-89	Other	Coma	54	2	77	14	11	NA	NA	NA	NA	NA	-5	Present	Present	Absent	Absent	Present	1	0.675324675	0	NA	0	Sufentanyl	3.376623377	NA	28	3	NA	0	4	1	1	47	1
3	Female	65-69	Vascular	Coma	59	2	65	3	7	2	0	0	2	0	-4	Present	Absent	NA	Present	Absent	0	NA	1	1.169230769	0	Fentanyl	NA	29.23076923	8	2	NA	0	2	0	0	16	0
4	Male	55-59	Traumatic brain injury	Coma	27	1	90	12	9	4	0	0	4	0	-5	Present	Present	NA	Present	Present	1	1.066666667	0	NA	0	Sufentanyl	5.333333333	NA	14	8	0	1	4	1	0	21	0
5	Male	30-34	Traumatic brain injury	Coma	47	1	72	7	3	5	0	0	4	1	-5	NA	Present	NA	NA	Present	1	1.666666667	0	NA	0	Sufentanyl	8.333333333	NA	7	4	0	1	1	0	0	11	0
6	Female	45-49	Traumatic brain injury	Coma	44	1	60	14	1	4	0	0	4	0	-5	Present	Present	Absent	Absent	Present	1	0.583333333	0	NA	0	Sufentanyl	6.666666667	NA	12	6	0	1	4	1	1	17	0
7	Female	65-69	Vascular	Coma	42	3	65	10	2	8	1	1	4	2	-4	Present	Absent	NA	Absent	Absent	1	1.092307692	0	NA	0	Fentanyl	NA	NA	4	NA	NA	0	NA	NA	NA	3	1
8	Female	25-29	Traumatic brain injury	Coma	57	1	60	6	9	4	0	0	4	0	-5	Present	Present	Absent	Present	Absent	1	0.666666667	0	NA	0	Sufentanyl	2.5	NA	10	4	0	1	2	0	1	23	0
9	Male	20-24	Traumatic brain injury	Coma	38	1	70	10	2	4	0	0	4	0	-5	Present	Present	Absent	Present	Absent	1	2.285714286	0	NA	0	Sufentanyl	10	NA	3	3	0	0	0	0	1	7	0
10	Female	45-49	Other	Coma	37	1	NA	11	4	10	1	4	4	1	-4	Present	Present	Present	Present	Absent	1	NA	1	NA	0	Sufentanyl	NA	NA	9	3	1	1	1	0	0	13	0
11	Male	60-64	Vascular	Surgery/procedure	49	1	83	8	1	6	0	0	4	2	-5	Present	Present	Present	Present	Present	1	0.43373494	0	NA	0	Sufentanyl	2.168674699	NA	50	13	1	0	9	1	NA	49	1
12	Male	25-29	Traumatic brain injury	Coma	47	1	90	9	8	NA	0	0	NA	0	-5	Present	NA	Absent	Absent	NA	1	0.8	0	NA	0	Sufentanyl	5.333333333	NA	15	5	0	1	1	0	1	19	0
13	Male	70-74	Vascular	Acute respiratory failure	49	2	82	10	9	8	0	3	4	1	-4	Present	Present	NA	Absent	Present	1	0.585365854	0	NA	0	Fentanyl	NA	29.26829268	NA	4	NA	0	-1	0	0	25	0
14	Male	40-44	Other	Coma	45	1	130	3	10	2	0	0	1	1	-5	Absent	Absent	NA	Present	Absent	0	NA	1	53.84615385	0	Fentanyl	NA	16.15384615	9	3	NA	0	Inf	1	0	8	1
15	Female	20-24	Vascular	Coma	48	1	57	6	5	5	0	2	2	1	-4	Present	Absent	Present	Present	Absent	1	0.842105263	1	21.0526315789474	0	Sufentanyl	4.210526316	NA	5	4	0	0	0	0	0	15	0
16	Male	40-44	Traumatic brain injury	Coma	28	1	80	14	1	4	0	0	4	0	-5	Present	Present	Absent	Present	Present	1	2.4	0	NA	0	Sufentanyl	9	NA	3	2	0	0	0	0	1	4	0
17	Female	35-39	Other	Coma	48	1	64	5	5	7	0	2	4	1	-4	Present	Present	Present	Present	Absent	1	2.25	0	NA	0	Sufentanyl	11.25	NA	5	2	0	1	1	0	0	9	0
18	Male	40-44	Vascular	Coma	52	1	70	4	5	0	0	0	0	0	-5	Absent	Absent	Absent	Absent	Absent	1	0.714285714	1	42.8571428571429	1	Sufentanyl	3.571428571	NA	7	3	1	1	Inf	1	NA	6	1
19	Male	80-84	Other	Coma	79	1	92	3	8	NA	NA	NA	NA	NA	-5	NA	NA	Present	NA	Absent	1	1.72826087	0	NA	0	Sufentanyl	5.217391304	NA	41	8	NA	1	3	0	1	49	0
20	Female	80-84	Vascular	Coma	60	3	60	3	10	NA	NA	NA	NA	NA	-4	Present	Present	Present	Present	Present	0	NA	1	20	0	No	0	0	10	2	0	0	Inf	1	0	9	1
21	Male	20-24	Traumatic brain injury	Coma	31	1	70	7	NA	NA	NA	NA	NA	NA	-4	Present	Present	NA	Absent	Present	1	1.714285714	1	20.2857142857143	0	Fentanyl	NA	65.71428571	8	5	NA	0	3	0	1	10	0
22	Female	75-79	Traumatic brain injury	Coma	46	1	80	14	3	5	0	0	4	1	-5	Present	Present	Absent	Present	Absent	1	0.9375	0	NA	0	Sufentanyl	3.75	NA	22	3	0	0	14	1	0	23	0
23	Male	20-24	Traumatic brain injury	Coma	32	1	71	8	4	6	0	0	4	2	-5	Present	Present	Absent	Present	Absent	1	0.507042254	0	NA	0	Sufentanyl	1.690140845	NA	10	4	0	1	5	1	1	17	0
24	Female	30-34	Vascular	Coma	47	3	120	3	5	NA	NA	NA	NA	NA	-5	Present	Present	Present	Present	Present	0	NA	1	7.5	0	Fentanyl	NA	29.16666667	6	4	1	1	1	0	0	45	0
25	Female	55-59	Vascular	Coma	29	1	NA	6	4	3	0	1	2	0	-4	Present	Absent	Absent	Present	Absent	1	NA	0	NA	0	Sufentanyl	NA	NA	13	2	0	1	7	1	0	15	0
26	Female	60-64	Vascular	Coma	66	1	67	3	8	5	0	0	4	1	-5	Present	Present	Absent	Present	Present	1	1.417910448	0	NA	0	Sufentanyl	5.671641791	NA	25	12	1	1	5	1	0	32	0
27	Female	80-84	Vascular	Acute respiratory failure	92	4	50	3	10	5	0	0	4	1	-5	Present	Present	NA	Present	Absent	1	0.96	0	NA	0	Fentanyl	NA	NA	3	NA	NA	1	NA	NA	NA	2	1
28	Female	60-64	Traumatic brain injury	Coma	NA	1	64	5	5	5	0	0	3	2	-5	Present	Absent	Absent	Present	Absent	1	1.875	0	NA	0	Sufentanyl	10.625	NA	14	5	0	1	9	1	0	17	0
29	Male	15-19	Traumatic brain injury	Coma	36	1	65	6	4	5	0	1	4	0	-4	Present	Present	Present	Present	Absent	1	1	0	NA	0	Sufentanyl	4.846153846	NA	12	4	0	1	-1	0	1	19	0
30	Female	60-64	Vascular	Coma	47	3	47	11	7	NA	NA	NA	NA	NA	-5	Present	Present	Present	Present	Present	1	1.276595745	1	5.1063829787234	0	Fentanyl	NA	28.72340426	NA	15	1	1	10	1	0	112	0
31	Male	40-44	Traumatic brain injury	Coma	28	1	64	13	4	7	0	2	4	1	-4	Present	Present	Present	Present	Present	1	0.75	0	NA	0	Sufentanyl	3.75	NA	26	3	1	1	1	0	1	33	0
32	Male	65-69	Traumatic brain injury	Coma	36	1	96	4	9	2	0	0	2	0	-5	Present	Absent	Absent	Absent	Present	1	1.40625	0	NA	0	Sufentanyl	8.59375	NA	10	4	0	1	6	1	1	16	1
33	Male	15-19	Traumatic brain injury	Coma	21	1	70	5	5	7	0	1	4	2	-4	Present	Present	Present	Present	Absent	1	1.485714286	0	NA	0	Sufentanyl	6.428571429	NA	16	5	0	1	20	1	1	33	0
34	Male	55-59	Traumatic brain injury	Coma	52	1	78	4	6	5	0	0	4	1	-5	Present	Present	Absent	Present	Present	1	1	0	NA	0	Sufentanyl	3.461538462	NA	11	2	0	1	4	1	1	13	0
35	Male	35-39	Traumatic brain injury	Coma	67	1	80	4	10	0	0	0	0	0	-5	Absent	Absent	Absent	Absent	Absent	1	2	1	2.5	0	Sufentanyl	10	NA	29	19	1	1	5	1	1	91	0
36	Female	35-39	Traumatic brain injury	Coma	46	1	60	10	7	5	1	0	4	0	-4	Present	Present	Absent	Present	Present	1	1	0	NA	0	Sufentanyl	0.5	NA	10	4	1	0	1	0	1	16	0
37	Male	15-19	Traumatic brain injury	Coma	37	1	75	9	4	2	0	0	2	0	-5	Present	Absent	Absent	Present	Present	1	3.2	0	NA	0	Sufentanyl	16	NA	13	12	0	1	1	0	1	20	0
38	Male	50-54	Vascular	Coma	42	1	82	6	7	1	0	0	1	0	-5	Absent	Absent	Absent	Present	Present	1	0.146341463	0	NA	0	Sufentanyl	0.609756098	NA	36	16	1	1	5	1	0	49	0
39	Male	15-19	Traumatic brain injury	Coma	53	1	70	4	7	2	0	0	2	0	-5	Present	Present	Absent	Absent	Present	1	1.714285714	0	NA	0	Sufentanyl	8.571428571	NA	24	16	1	1	5	1	1	27	0
40	Male	50-54	Other	Coma	38	1	71	14	2	NA	NA	NA	NA	NA	-5	Present	Present	Absent	Present	Absent	1	0	0	NA	0	Sufentanyl	NA	NA	5	4	NA	1	0	0	0	9	0
41	Male	45-49	Traumatic brain injury	Coma	NA	1	75	4	6	0	0	0	0	0	-5	Absent	Absent	Absent	Absent	Absent	1	2.24	0	NA	0	Sufentanyl	14	NA	12	10	1	1	Inf	1	NA	11	1
42	Female	70-74	Vascular	Coma	52	3	80	6	6	NA	NA	NA	NA	NA	-5	Present	Absent	Present	Absent	Present	1	1.5625	0	NA	0	Fentanyl	NA	30	31	13	1	1	9	1	0	53	0
43	Male	25-29	Traumatic brain injury	Coma	34	1	97	7	5	5	0	0	4	1	-5	Present	Present	Absent	Present	Present	1	0.721649485	0	NA	0	Sufentanyl	3.608247423	NA	17	13	1	1	2	0	1	19	0
44	Male	50-54	Other	Coma	46	2	80	7	10	9	1	3	4	1	-4	Present	Present	NA	Present	Absent	1	0.4875	0	NA	0	Fentanyl	NA	20.625	4	2	NA	0	1	0	0	8	0
45	Female	60-64	Vascular	Coma	48	1	88	4	11	NA	0	0	NA	0	-4	NA	Absent	NA	Present	Present	1	0.545454545	0	NA	0	Sufentanyl	2.727272727	NA	19	2	1	1	8	1	1	30	0
46	Female	45-49	Vascular	Coma	44	3	52	7	9	NA	NA	NA	NA	NA	-4	Present	Present	Present	Present	Present	0	NA	1	64.61538462	0	Fentanyl	NA	69.23076923	7	NA	1	1	NA	NA	NA	6	1
47	Male	35-39	Vascular	Coma	57	1	110	9	5	4	0	0	4	0	-5	Present	Present	Absent	Absent	Present	1	9.090909091	0	NA	0	Sufentanyl	2.272727273	NA	NA	14	1	1	3	0	NA	76	0
48	Female	75-79	Other	Coma	60	3	70	4	7	5	0	0	4	1	-4	Present	Present	NA	Present	Present	0	NA	1	22.85714286	0	Fentanyl	NA	NA	5	NA	NA	0	NA	NA	NA	4	1
49	Female	55-59	Vascular	Coma	48	2	66	7	5	2	0	0	2	0	-5	Present	Absent	Absent	Present	Absent	1	2.181818182	0	NA	0	Sufentanyl	10.90909091	NA	15	3	0	1	5	1	1	18	0
50	Male	25-29	Traumatic brain injury	Other	12	2	86	15	5	9	1	3	4	1	-4	Present	Present	NA	Present	Absent	1	0.813953488	0	NA	0	Fentanyl	NA	27.90697674	NA	7	NA	1	0	0	1	18	0
51	Male	30-34	Traumatic brain injury	Coma	63	1	92	3	10	3	0	0	2	1	-5	Present	Absent	Absent	Present	Absent	1	1.086956522	1	17.3913043478261	0	Sufentanyl	5.434782609	NA	61	12	1	1	4	1	1	90	0
52	Male	30-34	Traumatic brain injury	Coma	29	1	79	13	8	2	0	0	2	0	-5	NA	Present	NA	Present	Present	1	4.253164557	0	NA	0	Sufentanyl	12.15189873	NA	21	17	1	1	2	0	1	30	0
53	Female	50-54	Traumatic brain injury	Coma	55	2	89	3	7	2	0	0	0	2	-5	Absent	Absent	Absent	Present	Absent	1	0.449438202	0	NA	0	Sufentanyl	2.247191011	NA	10	3	0	1	Inf	1	NA	9	1
54	Male	40-44	Traumatic brain injury	Coma	32	1	75	11	4	6	0	0	4	2	-5	Present	Present	Absent	Present	Absent	1	1.92	0	NA	0	Sufentanyl	9.6	NA	14	11	1	1	2	0	1	20	0
55	Female	35-39	Traumatic brain injury	Coma	27	1	53	12	4	3	0	0	2	1	-5	Present	Absent	Absent	Absent	Absent	1	4.528301887	0	NA	0	Sufentanyl	22.64150943	NA	18	8	1	1	6	1	1	21	0
56	Male	40-44	Traumatic brain injury	Coma	34	1	92	14	4	2	0	0	2	0	-4	Absent	Present	Absent	Present	Absent	1	2.086956522	0	NA	0	Sufentanyl	10.43478261	NA	7	4	0	1	2	0	1	11	0
57	Male	65-69	Vascular	Surgery/procedure	41	1	122	10	1	3	1	0	2	0	-4	Present	Absent	Present	Present	Present	1	0.540983607	0	NA	0	Sufentanyl	2.704918033	NA	NA	15	0	1	NA	NA	1	89	0
58	Female	60-64	Vascular	Surgery/procedure	28	3	60	14	1	NA	NA	NA	NA	NA	-4	Absent	Present	Present	Present	Absent	0	NA	1	19	0	No	0	0	13	11	1	1	0	0	1	26	0
59	Female	95-99	Other	Acute respiratory failure	57	1	75	15	1	NA	NA	NA	NA	NA	-5	Absent	Present	Absent	Present	Present	1	0.8	0	NA	0	Sufentanyl	0.8	NA	7	5	NA	0	2	0	1	20	0
60	Male	20-24	Traumatic brain injury	Coma	36	1	85	8	4	4	0	0	4	0	-5	Present	Present	Absent	Present	Absent	1	2.823529412	0	NA	0	Sufentanyl	7.058823529	NA	8	8	1	1	-1	0	1	11	0
61	Male	50-54	Traumatic brain injury	Coma	74	1	76	6	6	2	0	0	2	0	-5	Present	Absent	Absent	Absent	Absent	1	1.184210526	0	NA	0	Sufentanyl	5.263157895	NA	19	4	0	1	Inf	1	NA	18	1
62	Male	65-69	Vascular	Coma	NA	1	70	10	4	6	0	2	4	0	-4	Present	Present	Absent	Present	Absent	1	0.057142857	1	47.1428571428571	0	Sufentanyl	7.285714286	NA	11	3	1	0	6	1	1	14	0
63	Female	50-54	Other	Coma	NA	1	60	3	9	2	0	0	2	0	-4	Absent	Present	NA	Absent	Present	1	1.6	0	NA	0	Fentanyl	NA	44.16666667	9	5	NA	0	Inf	1	NA	8	1
64	Female	65-69	Vascular	Coma	39	1	84	15	8	2	0	0	2	0	-4	Present	Absent	Present	Present	Present	1	0	0	NA	0	Sufentanyl	NA	NA	17	4	0	0	17	1	0	23	0
65	Female	50-54	Vascular	Coma	25	3	60	NA	NA	8	0	3	4	1	-4	Present	Present	NA	Present	Absent	0	NA	1	10.83333333	0	Fentanyl	NA	22.5	10	2	NA	0	3	0	0	12	0
66	Male	60-64	Vascular	Coma	37	1	NA	9	5	4	0	0	4	0	-5	Present	Present	Absent	Present	Absent	1	NA	0	NA	0	Sufentanyl	NA	NA	27	4	1	1	22	1	1	34	0
67	Male	65-69	Traumatic brain injury	Coma	36	1	92	14	3	5	0	2	2	1	-4	Present	Absent	Absent	Present	Present	1	1.565217391	0	NA	0	Sufentanyl	6.52173913	NA	29	19	1	1	5	1	1	43	0
68	Male	25-29	Traumatic brain injury	Coma	32	1	78	8	6	2	0	0	2	0	-5	Present	Absent	Absent	Absent	Present	1	1.794871795	0	NA	0	Sufentanyl	8.461538462	NA	11	6	1	1	0	0	1	15	0
69	Female	55-59	Other	Coma	44	1	90	3	9	NA	NA	NA	NA	NA	-4	Present	Present	Present	Present	Present	1	1.333333333	0	NA	0	Sufentanyl	5.333333333	NA	24	4	NA	1	1	0	1	29	0
70	Male	20-24	Traumatic brain injury	Coma	56	1	80	6	9	5	0	0	4	1	-5	Present	Present	Absent	Present	Absent	1	1	1	10	0	Sufentanyl	5	NA	29	5	1	1	15	1	1	56	0
71	Male	50-54	Traumatic brain injury	Coma	33	1	95	11	3	5	0	0	4	1	-5	Present	Present	Present	Present	Present	1	2.526315789	0	NA	0	Sufentanyl	7.578947368	NA	32	20	1	1	-2	0	1	35	0
72	Female	25-29	Vascular	Coma	41	1	60	6	8	5	0	2	2	1	-4	Present	Absent	NA	Present	Present	1	0.333333333	0	NA	0	Sufentanyl	1.666666667	NA	3	2	0	0	0	0	1	10	0
73	Male	35-39	Other	Coma	48	1	70	3	7	NA	NA	NA	NA	NA	-5	Present	Present	Present	Present	Present	1	3.428571429	0	NA	0	Sufentanyl	6.857142857	NA	15	10	NA	0	0	0	1	22	0
74	Male	50-54	Other	Coma	34	1	100	9	8	7	0	1	4	2	-4	Present	Present	Present	Absent	Absent	1	4.5	0	NA	0	Sufentanyl	2.05	NA	2	3	0	0	0	0	1	11	0
75	Male	50-54	Traumatic brain injury	Coma	45	1	80	6	5	4	0	0	4	0	-5	Present	Present	Present	Present	Absent	1	2.75	1	11.25	0	Sufentanyl	6.875	NA	13	12	1	0	-1	0	1	17	0
76	Female	35-39	Other	Coma	57	1	85	8	7	2	0	0	2	0	-5	Present	Absent	Absent	Present	Present	1	2.647058824	0	NA	1	Sufentanyl	8.823529412	NA	103	18	1	1	88	1	0	129	0
77	NA	40-44	Other	Coma	NA	NA	70	NA	NA	5	0	0	4	1	-4	Present	Present	NA	Present	Absent	1	0.328571429	0	NA	0	Fentanyl	NA	16.42857143	5	6	NA	NA	0	0	NA	NA	0
78	Male	35-39	Traumatic brain injury	Coma	26	1	94	13	3	6	0	2	4	0	-4	Present	Present	Absent	Present	Absent	1	1.276595745	1	2.12765957446809	0	Sufentanyl	3.191489362	NA	4	3	1	1	1	0	1	10	0
79	Male	80-84	Traumatic brain injury	Coma	37	1	74	10	5	4	0	0	4	0	-5	Present	Present	Absent	Absent	Present	1	1.945945946	0	NA	0	Sufentanyl	10	NA	9	3	0	0	Inf	1	NA	8	1
80	Male	60-64	Traumatic brain injury	Coma	59	2	53	8	2	1	0	0	1	0	-5	Absent	Absent	Absent	Present	Present	1	2.264150943	0	NA	0	Sufentanyl	13.58490566	NA	22	4	0	0	3	0	0	25	0
81	Male	80-84	Other	Acute respiratory failure	42	1	71	3	9	NA	NA	NA	NA	NA	-4	Present	Present	Present	Present	Present	1	0.577464789	0	NA	0	Sufentanyl	3.38028169	NA	4	3	NA	0	0	0	0	4	0
82	Male	50-54	Vascular	Coma	76	2	90	4	9	2	0	0	2	0	-5	Present	Absent	Absent	Absent	Absent	1	2	0	NA	0	Sufentanyl	8	NA	12	11	1	0	Inf	1	NA	11	1
83	Female	50-54	Vascular	Coma	63	1	70	6	6	4	0	0	4	0	-5	Absent	Absent	NA	Present	Absent	1	1.428571429	0	NA	0	Sufentanyl	3.142857143	NA	17	4	0	1	1	0	1	20	0
84	Male	50-54	Traumatic brain injury	Coma	53	1	68	7	4	3	0	0	2	1	-5	NA	Absent	Absent	Present	Absent	1	0.220588235	0	NA	0	Sufentanyl	1.102941176	NA	41	14	1	1	8	1	1	44	0
85	Female	50-54	Vascular	Coma	12	1	58	14	1	10	1	3	4	2	-4	Present	Present	Present	Absent	Present	1	2.137931034	0	NA	0	Sufentanyl	4.827586207	NA	11	3	0	1	1	0	1	13	0
86	Male	25-29	Traumatic brain injury	Coma	55	1	65	4	8	2	0	0	2	0	-5	Present	Absent	NA	Present	Present	1	1.846153846	0	NA	0	Sufentanyl	9.230769231	NA	10	6	1	1	2	0	1	16	0
87	Male	50-54	Traumatic brain injury	Coma	50	1	110	3	7	3	0	1	2	0	-4	Present	Absent	NA	Present	Absent	0	NA	1	12.36363636	0	Fentanyl	NA	20.45454545	13	2	NA	0	Inf	1	0	12	1
88	Female	65-69	Other	Other	61	2	68	NA	NA	3	0	0	2	1	-5	Present	Absent	NA	Present	Absent	0	NA	1	105.8823529	0	Fentanyl	NA	NA	3	3	NA	0	0	0	0	3	0
89	Male	80-84	Other	Acute respiratory failure	62	1	86	14	1	NA	NA	NA	NA	NA	-4	Present	Present	Absent	Present	Present	1	1.627906977	0	NA	0	Sufentanyl	1.511627907	NA	10	4	NA	0	5	1	0	13	0
90	Male	30-34	Traumatic brain injury	Coma	56	1	82	10	5	4	0	0	3	1	-4	Present	Absent	Present	Present	Absent	1	2.195121951	0	NA	0	Sufentanyl	7.682926829	NA	14	6	0	1	2	0	1	22	0
91	Male	40-44	Traumatic brain injury	Coma	56	1	72	4	8	2	0	0	2	0	-5	Absent	Present	Absent	Present	Present	1	1.75	0	NA	0	Sufentanyl	8.75	NA	28	5	0	1	5	1	1	62	0
92	Male	40-44	Vascular	Coma	24	1	70	11	4	0	0	0	0	0	-5	Absent	Absent	NA	Absent	Present	1	4.5	1	68.5714285714286	0	Sufentanyl	15	NA	4	4	0	1	0	0	1	11	0
93	Male	60-64	Traumatic brain injury	Coma	37	1	72	10	4	0	0	0	0	0	-5	Absent	Absent	Absent	Absent	Absent	1	1.333333333	0	NA	0	Sufentanyl	6.666666667	NA	5	1	0	0	Inf	1	NA	4	1
94	Female	75-79	Vascular	Coma	50	1	NA	4	5	5	0	0	4	1	-4	Present	Present	Absent	Present	Absent	1	NA	0	NA	0	Sufentanyl	NA	NA	7	1	0	0	Inf	1	NA	6	1
95	Male	25-29	Traumatic brain injury	Coma	65	1	90	3	6	1	0	0	1	0	-5	Absent	Present	Absent	Absent	Present	1	2.666666667	1	44.4444444444444	1	Sufentanyl	10.66666667	NA	22	16	1	1	0	0	1	38	0
96	Female	30-34	Traumatic brain injury	Coma	NA	1	55	8	5	4	0	0	4	0	-5	Present	Present	Absent	Absent	Present	1	3.927272727	0	NA	0	Sufentanyl	6.545454545	NA	33	3	0	1	20	1	0	48	0
97	Female	75-79	Other	Surgery/procedure	58	1	56	4	6	NA	NA	NA	NA	NA	-5	Present	Present	Absent	Present	Present	1	0.357142857	0	NA	0	No	0	0	19	3	NA	0	Inf	1	1	19	1
98	Male	70-74	Other	Coma	71	3	69	3	10	NA	NA	NA	NA	NA	-5	Absent	Present	Absent	Present	Absent	0	NA	1	NA	0	No	0	0	NA	1	NA	0	0	0	NA	2	0
99	Female	25-29	Traumatic brain injury	Coma	62	1	73	3	9	9	0	3	4	2	-4	Present	Present	Absent	Present	Absent	1	1.643835616	0	NA	0	Sufentanyl	6.575342466	NA	9	5	0	0	0	0	1	18	0
100	Male	20-24	Traumatic brain injury	Coma	58	1	73	5	8	4	0	0	4	0	-5	Absent	Present	Present	Present	Present	1	3.287671233	0	NA	0	Sufentanyl	6.575342466	NA	13	4	0	1	6	1	1	23	0
101	Female	30-34	Other	Other	17	1	55	12	3	0	0	0	0	0	-5	Absent	Absent	NA	Absent	Absent	1	1.090909091	1	17.8181818181818	0	Fentanyl	NA	81.81818182	7	7	NA	0	0	0	0	18	0
102	Female	55-59	Traumatic brain injury	Other	33	NA	70	9	4	7	0	3	4	0	-4	Present	Present	NA	Present	Present	0	NA	1	21.71428571	0	Fentanyl	NA	38.57142857	3	3	NA	NA	0	0	0	6	0
103	Male	60-64	Vascular	Coma	28	1	87	9	4	4	0	0	4	0	-5	Present	Present	Absent	Present	Present	1	2.75862069	0	NA	0	Sufentanyl	18.3908046	NA	10	3	0	1	7	1	0	25	0
104	Female	60-64	Vascular	Coma	52	1	71	3	5	4	0	0	4	0	-5	Present	Present	Absent	Present	Absent	1	1.014084507	0	NA	0	Sufentanyl	5.070422535	NA	12	10	1	1	Inf	1	NA	11	1
105	Male	40-44	Other	Surgery/procedure	65	1	78	NA	NA	10	1	3	4	2	-4	Present	Present	Present	Present	Absent	1	0.102564103	0	NA	0	Sufentanyl	0.512820513	NA	15	7	1	1	2	0	0	21	0
106	Male	35-39	Traumatic brain injury	Coma	NA	1	77	NA	4	4	0	0	4	0	-5	Present	Present	Absent	Present	Present	1	1.87012987	0	NA	0	Sufentanyl	9.350649351	NA	22	2	0	1	Inf	1	NA	21	1
107	Female	40-44	Traumatic brain injury	Coma	34	1	NA	3	5	1	0	0	1	0	-5	Absent	Absent	Present	Present	Present	1	NA	0	NA	0	Sufentanyl	NA	NA	23	6	1	1	5	1	0	27	0
108	Female	75-79	Traumatic brain injury	Coma	67	1	80	3	8	2	0	0	2	0	-5	Absent	Absent	Absent	Absent	Absent	1	2	1	16.875	0	Sufentanyl	10.375	NA	5	2	1	0	Inf	1	NA	4	1
109	Female	80-84	Other	Shock	51	2	74	3	9	NA	NA	NA	NA	NA	-4	Present	Present	Present	Present	Present	1	0.932432432	0	NA	0	Sufentanyl	2.837837838	NA	8	2	NA	0	1	0	0	12	0
110	Male	20-24	Traumatic brain injury	Coma	21	1	72	10	3	2	0	0	2	0	-5	Present	Absent	Absent	Present	Present	1	3.333333333	1	18.0555555555556	0	Sufentanyl	10	NA	14	14	1	1	0	0	1	16	0
111	Male	30-34	Other	Acute respiratory failure	26	1	134	15	6	NA	NA	NA	NA	NA	-5	Absent	Present	Absent	Absent	Present	1	2.164179104	0	NA	0	Sufentanyl	6.567164179	NA	17	17	NA	1	Inf	1	0	17	1
112	Female	55-59	Vascular	Coma	48	3	79	11	5	NA	NA	NA	NA	NA	-5	Present	Present	Present	Present	Present	1	0.759493671	1	5.94936708860759	0	Fentanyl	NA	22.78481013	47	5	0	0	9	1	0	30	0
113	Male	55-59	Traumatic brain injury	Coma	45	1	80	4	6	2	0	0	2	0	-5	Present	Absent	Absent	Absent	Present	1	2.25	0	NA	0	Sufentanyl	11.25	NA	27	24	1	1	1	0	0	32	0
114	Male	65-69	Traumatic brain injury	Coma	43	3	75	7	8	2	0	0	2	0	-5	Absent	Absent	NA	Absent	Absent	1	0.746666667	0	NA	1	Fentanyl	NA	16	8	5	NA	0	Inf	1	0	7	1
115	Male	45-49	Traumatic brain injury	Coma	35	1	80	12	2	5	0	0	4	1	-5	Present	Present	Absent	Present	Absent	1	0.125	0	NA	0	Sufentanyl	0.375	NA	26	19	1	1	4	1	0	39	0
116	Male	15-19	Traumatic brain injury	Coma	NA	1	60	6	8	5	0	0	4	1	-4	Present	Absent	Absent	Present	Absent	1	1.4	0	NA	0	Sufentanyl	2	NA	10	2	0	1	7	1	1	14	0
117	Female	55-59	Other	Coma	50	1	68	6	3	2	0	0	2	0	-5	Present	Absent	Absent	Absent	Absent	1	3.529411765	1	49.4117647058824	0	Sufentanyl	17.64705882	NA	32	8	0	1	NA	NA	NA	43	0
118	Male	65-69	Other	Coma	83	1	67	3	12	NA	NA	NA	NA	NA	-5	Present	Absent	Absent	Absent	Present	1	1.940298507	0	NA	0	Sufentanyl	0.970149254	NA	25	24	NA	1	Inf	1	NA	24	1
119	Male	25-29	Traumatic brain injury	Coma	22	1	85	9	6	5	0	1	4	0	-4	Present	Present	NA	Present	Absent	0	NA	1	25.88235294	0	Fentanyl	NA	25.88235294	5	2	NA	0	2	0	0	10	0
120	Male	55-59	Traumatic brain injury	Coma	65	1	81	4	13	0	0	0	0	0	-5	Absent	Absent	Absent	Absent	Absent	1	2.962962963	1	44.4444444444444	0	Sufentanyl	14.81481481	NA	10	5	1	0	Inf	1	NA	9	1
121	Female	20-24	Traumatic brain injury	Coma	40	1	52	5	8	5	0	0	4	1	-5	NA	Present	NA	Present	Present	1	0.692307692	0	NA	0	Sufentanyl	3.461538462	NA	16	12	1	1	3	0	1	19	0
122	Female	65-69	Vascular	Coma	51	1	70	3	6	0	0	0	0	0	-4	Absent	NA	NA	Absent	Absent	0	NA	1	31.42857143	0	Fentanyl	NA	34.28571429	14	2	NA	1	0	0	0	13	1
123	Female	75-79	Vascular	Surgery/procedure	48	3	78	9	5	NA	NA	NA	NA	NA	-4	Present	Present	Present	Present	Absent	1	4.038461538	0	NA	0	Fentanyl	NA	3.846153846	15	2	NA	0	19	1	0	19	0
124	Male	30-34	Traumatic brain injury	Coma	32	1	102	7	5	2	0	0	2	0	-5	Present	Absent	Absent	Absent	Present	1	2.352941176	0	NA	1	Sufentanyl	11.76470588	NA	31	5	1	1	13	1	1	52	0
125	Female	30-34	Other	Coma	51	1	NA	10	2	2	0	0	2	0	-5	Present	Absent	Absent	Present	Present	1	NA	1	NA	0	Sufentanyl	NA	NA	32	4	0	1	1	0	1	35	0
126	Male	45-49	Traumatic brain injury	Coma	46	1	84	7	1	NA	NA	NA	NA	NA	-5	Present	Absent	Absent	Present	Absent	1	0.833333333	0	NA	0	Sufentanyl	4.166666667	NA	25	12	1	0	12	1	1	37	0
127	Female	60-64	Traumatic brain injury	Coma	48	1	76	6	6	4	1	2	1	0	-5	Absent	Absent	Absent	Present	Absent	1	1.973684211	0	NA	0	Sufentanyl	7.368421053	NA	74	18	1	1	3	0	1	78	0
128	Female	65-69	Vascular	Coma	38	2	72	7	3	2	0	0	2	0	-5	Present	Absent	Absent	Present	Absent	1	0.722222222	0	NA	0	Sufentanyl	3.611111111	NA	45	4	0	0	18	1	1	53	0
129	Male	55-59	Vascular	Coma	73	1	64	3	5	4	0	0	3	1	-5	Present	Absent	NA	Present	Absent	1	1.328125	0	NA	0	Sufentanyl	7.8125	NA	19	5	1	1	Inf	1	NA	18	1
130	Male	55-59	Traumatic brain injury	Coma	31	1	98	7	6	7	0	2	4	1	-4	Present	Present	Absent	Present	Absent	1	1.224489796	0	NA	0	Sufentanyl	4.897959184	NA	19	16	1	0	3	0	1	26	0
131	Female	20-24	Traumatic brain injury	Coma	48	1	62	5	6	5	0	0	4	1	-5	Present	Present	Absent	Present	Absent	1	2.258064516	0	NA	0	Sufentanyl	14.51612903	NA	41	3	0	1	11	1	1	45	0
132	Male	45-49	Vascular	Coma	37	1	85	5	5	5	0	0	4	1	-5	Absent	Absent	Present	Present	Present	1	0.294117647	0	NA	0	Sufentanyl	1.176470588	NA	36	30	0	1	3	0	0	43	0
133	Female	55-59	Vascular	Coma	49	2	47	10	5	4	0	0	4	0	-5	Present	Present	Absent	Present	Present	1	3.574468085	0	NA	0	Sufentanyl	15.31914894	NA	68	12	0	1	4	1	1	71	0
134	Male	50-54	Traumatic brain injury	Coma	57	1	76	6	12	2	0	0	2	0	-5	Present	Absent	Absent	Present	Absent	1	3.157894737	0	NA	0	Sufentanyl	15.78947368	NA	30	10	0	1	12	1	1	85	0
135	Male	30-34	Traumatic brain injury	Coma	34	1	93	10	11	2	0	0	2	0	-5	Present	Absent	Absent	Present	Present	1	1.290322581	0	NA	0	Sufentanyl	6.451612903	NA	9	9	0	0	0	0	0	10	0
136	Female	50-54	Vascular	Coma	37	3	92	7	6	NA	NA	NA	NA	NA	-4	Present	Absent	Present	Present	Present	0	NA	1	14.13043478	0	Fentanyl	NA	12.5	16	5	NA	1	11	1	0	24	0
137	Female	20-24	Traumatic brain injury	Coma	42	1	50	3	5	3	0	0	2	1	-5	Absent	Present	Absent	Present	Present	1	1.2	0	NA	0	Sufentanyl	7.2	NA	8	4	0	0	2	0	0	19	0

## Sheet: DHM
Name of variable	Variable	Coding
uid	Unique patient identifier	(generated randomly at data export to avoid identification)
sex	Patient's sex	self-explanatory
age	Age at inclusion	in years
motifadm2	Reasons for admission	self-explanatory
motifintub	Reasons for initiation of mechanical ventilation	self-explanatory
IGS2	SAPS-II
maccabe	McCabe score
poids	Weight	in kg
GCSadm	Glasgow Coma Scale (GCS) at admission
SOFAadm	SOFA at admission
FOUR	FOUR score at admission
FOUR.E	FOUR: Eye response
FOUR.M	FOUR: Motor response
FOUR.B	FOUR: Brainstem reflexes
FOUR.R	FOUR: Respiration
RASSinc	RASS at admission
corneal	Corneal reflex	Present/Absent reflex
plr	Pupillary light reflex	Present/Absent reflex
gtp	Grimacing to pain	Present/Absent reflex
cough	Cough reflex	Present/Absent reflex
myosis	Myosis	Present/Absent reflex
midazolam	Tretment by midazolam at day 1	1: Yes / 0: No
dose_midazolam	Midazolam daily dose (day 1)	mg/kg
propofol	Tretment by propofol at day 1	1: Yes / 0: No
dose_propofol	Propofol daily dose (day 1)	mg/kg
thiopental	Tretment by thiopental at day 1	1: Yes / 0: No
morphinique	Morphinic agents at day 1	self-explanatory
dose_sufenta	Sufentanyl daily dose (day 1)	µg/kg
dose_fenta	Fentanyl daily dose (day 1)	µg/kg
durvent	Duration of mechanical Ventilation	days
dursedat	Duration of sedative infusion	days
htic	Occurrence of elevated intracranial pressure	1: Yes / 0: No
PAVM	Occurrence of ventilator acquired pneumonia	1: Yes / 0: No
delawake	Time to awakening from the day of sedation cessation	days ("Inf" if died before awakening), can be negative if patient awake before sedation cessation
delayed	Delayed awakening	1: Yes / 0: No
delirium	Delirium at awakening	1: Yes / 0: No
ICUstay	ICU death	1: Yes / 0: No
dcrea	Length of ICU stay	days
